# Supplementary material
Source: PubMed Central journal article supplement (PMC6237435)
Supplement: kccy-17-19-20-1526598-s001.pdf [file kccy-17-19-20-1526598-s001.pdf]

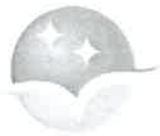

# 上海芯超生物科技有限公司

Shanghai Outdo Biotech Company

Barcode

## 伦理委员会审核意见书

编号/Ctl No.

YB M-05-02

版本/Version

1.0

项目名称

家蚕雌不育无脚突变 ap 的分子解析及其基因调控研究;家蚕黑化代表型突变体的分子机制研究

项目来源

国家自然科学基金

项目承担单位

西南大学

项目编号

31472153;31372379

项目负责人

童晓玲

审核结果

参加伦理委员会会议 9 人, 投票结果:

- A) 同意 9 票
- B) 修正后再审查 \_\_\_\_\_ 票
- C) 不同意 \_\_\_\_\_ 票
- D) 暂停或终止 \_\_\_\_\_ 票

伦理委员会审查意见:

申报内容经审查, 符合伦理要求, 同意开展研究。

记录人签名:

2015年12月11日

主任委员签名:  
(伦理委员会盖章)

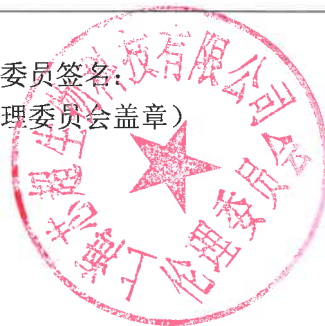

2015年12月11日

保存期限: 长期

|                                                                                   |                                                                                                                                                                   |        |                                         |                                                                                                                    |
|-----------------------------------------------------------------------------------|-------------------------------------------------------------------------------------------------------------------------------------------------------------------|--------|-----------------------------------------|--------------------------------------------------------------------------------------------------------------------|
|  | <b>上海芯超生物科技有限公司</b><br>Shanghai Outdo Biotech Company                                                                                                             |        | Barcode                                 |                                                                                                                    |
|                                                                                   | <b>样本使用伦理审查申请表</b>                                                                                                                                                |        | 编号/Ctl No. YB M-05-01<br>版本/Version 1.0 |                                                                                                                    |
| 项目名称:                                                                             | 家蚕雌不育无脚突变 ap 的分子解析及其基因调控研究;家蚕黑化代表型突变体的分子机制研究                                                                                                                      | 项目编号:  | No. 31472153<br>No. 31372379            |                                                                                                                    |
| 项目来源:                                                                             | 国家自然科学基金                                                                                                                                                          | 资金来源:  |                                         |                                                                                                                    |
| 样本名称:                                                                             | 组织芯片 HOrg-C120PG-02                                                                                                                                               | 样本数量:  | 1 张                                     |                                                                                                                    |
| 申请人:                                                                              | 李念念                                                                                                                                                               | 联系方式:  | 13193064200                             |                                                                                                                    |
| 研究者 1:                                                                            | 代方银 职称: 教授                                                                                                                                                        | 研究者 2: | 童晓玲 职称: 副教授                             |                                                                                                                    |
| 项目承担单位:                                                                           | 西南大学                                                                                                                                                              |        |                                         |                                                                                                                    |
| 项目负责人:                                                                            | 童晓玲                                                                                                                                                               | 联系方式:  | 13193064200                             |                                                                                                                    |
| 拟研究时间:                                                                            | ____2015年__1月__1日 至 ____2020__年__12__月__1__日                                                                                                                      |        |                                         |                                                                                                                    |
| 一、请阐述该样本用于研究的描述(包括目标和假设):<br>石蜡切片用于免疫组化<br><br>二、项目研究的方法:<br>免疫组化                 |                                                                                                                                                                   |        |                                         |                                                                                                                    |
| 备注                                                                                |                                                                                                                                                                   |        |                                         |                                                                                                                    |
|                                                                                   | 申报部门意见:<br><br><div style="text-align: right;">           部门负责人签(章):  </div> |        |                                         |                                                                                                                    |
| 说明                                                                                | 为有效利用宝贵的样本资源, 您需向样本库提供一份简要的研究设计(如上)和所要求的资料, 您要保证您将合法地使用样本, 并进行您的上述研究, 您需承诺在您的研究成果和文章上注明样本来源于: 上海芯超·生物样本库<br><br>申请程序: 下载申请表----填写申请表----负责人签字(盖章)----样本库伦理委员会审核   |        |                                         |                                                                                                                    |
| 申请人: 李念念                                                                          | 2015 年 12 月 8 日                                                                                                                                                   |        | 样本库审核意见:                                | 样本库负责人签字: <br>2015 年 12 月 8 日 |

保存期限: 长期
